# Supplementary material for: Milestones and Key performance Indicators to Assess the Capacity of Rapid Response Teams in the Eastern Mediterranean Region: A Methodological Approach
Source: Research Square preprint supplement (doi:10.21203/rs.3.rs-3230204/v1), 2023-08-09
Supplement: Supplementary file 1 [file 1997abedd72b7a9c3e18c08e.docx]

Milestones and Key performance Indicators to Assess the Capacity of Rapid Response Teams in the Eastern Mediterranean Region: A Methodological Approach

**Supplementary materials**

**Tables**

**Table 1: Classification of KPIs into input, process, output, and outcome according to the RRT log model.**

| Category | Indicator |
| --- | --- |
| Input | 1. Organization of RRT |
|  | 1. Number of RRT members at the national and sub-national levels. # |
|  | 1. Presence of SOP for RRT operation |
|  | 1. Presence of and RRT Roster * |
|  | 1. Presence of country mechanism to monitor and evaluate RRT |
|  |  |
| Process | 1. Financial provision and timely release of funds |
|  | 1. Logistic support for RRT operations |
|  |  |
| Output | 1. Presence of an updated RRT roster ** |
|  |  |
| Outcome | 1. Retention rate of RRT members |
|  | 1. Skill status of RRT members |
|  | 1. Timeliness of verification of outbreak alert |
|  | 1. Timeliness of deployment of RRT |
|  | 1. Timeliness of application of control measures |
|  | 1. Completeness of RRT response |
|  | 1. Interventional response to outbreaks |
|  | 1. Internal post-deployment review or assessment meeting |

Two indicators * and ** together form the composite indicator 1.2 (Presence of roster system)

# number of RRT members at the subnational level refers to decentralization of RRT which is an output indicator.

**Table 2: Classification of KPIs according to RRT cycle**

| Phase | Indicator |
| --- | --- |
| Non-emergency phase |  |
| Planning |  |
|  | 1. Organization of RRT |
|  | 1. Number of team members at the national and sub-national levels |
|  | 1. Presence of SOPs for RRT |
|  | 1. Financial support for RRT operation |
|  | 1. Presence of a country mechanism to monitor and evaluate RRT operations |
| Training |  |
|  | 1. Skill status of RRT members |
| Rostering |  |
|  | 1. Roster system |
|  | 1. Retention rate of RRT members |
| Emergency phase |  |
| Pre-deployment |  |
|  | 1. Logistic support for RRT operation |
|  | 1. Timeliness of verification of outbreak alert |
| Deployment |  |
|  | 1. Timeliness of deployment of RRT |
|  | 1. Timeliness of application of control measures |
| Post-Deployment |  |
|  | 1. Completeness of RRT response (documentation and reporting) |
|  | 1. Interventional response to outbreaks |
|  | 1. Internal post-deployment review or assessment meeting |
